# Supplementary material for: Does the Match between Gender and Race of Graduate Teaching Assistants and Undergraduates Improve Student Performance in Introductory Biology?
Source: Atypon-hosted journal article supplement (doi:10.1187/cbe.20-07-0137), 2020-11-20
Supplement: combinedsupmats.pdf [file combinedsupmats.pdf]

# Supplemental Material

*CBE—Life Sciences Education*

Lee and Ing

Table S1. Regression output for course grades

|                        | <i>Model 1<br/>(only<br/>includes<br/>covariates)</i> | <i>Model 2<br/>(Match-<br/>Gender;<br/>no<br/>covariates)</i> | <i>Model 3<br/>(Match-<br/>Gender +<br/>covariates)</i> | <i>Model 4<br/>(Match-<br/>Ethnicity;<br/>no<br/>covariates)</i> | <i>Model 5<br/>(Match-<br/>Ethnicity+<br/>covariates)</i> | <i>Model 6<br/>(Match-Low-<br/>Income; no<br/>covariates)</i> | <i>Model 7<br/>(Match-Low-<br/>Income<br/>+covariates)</i> | <i>Model 8<br/>Match-First<br/>Generation;<br/>no<br/>covariates</i> | <i>Model 9<br/>Match-First<br/>Generation<br/>+covariates</i> |
|------------------------|-------------------------------------------------------|---------------------------------------------------------------|---------------------------------------------------------|------------------------------------------------------------------|-----------------------------------------------------------|---------------------------------------------------------------|------------------------------------------------------------|----------------------------------------------------------------------|---------------------------------------------------------------|
| Match-Gender           |                                                       | 0.05<br>(0.06)                                                | -0.03<br>(0.06)                                         |                                                                  |                                                           |                                                               |                                                            |                                                                      |                                                               |
| Match-Ethnicity        |                                                       |                                                               |                                                         | 0.14<br>(0.06)                                                   | 0.05<br>(0.07)                                            |                                                               |                                                            |                                                                      |                                                               |
| Match-Low-Income       |                                                       |                                                               |                                                         |                                                                  |                                                           | 0.12<br>(0.06)                                                | 0.03<br>(0.07)                                             |                                                                      |                                                               |
| Match-First Generation |                                                       |                                                               |                                                         |                                                                  |                                                           |                                                               |                                                            | 0.13<br>(0.06)                                                       | 0.14<br>(0.10)                                                |
| Female                 | -0.14*<br>(0.06)                                      |                                                               | -0.15*<br>(0.06)                                        |                                                                  | -0.14*<br>(0.06)                                          |                                                               | -0.14*<br>(0.06)                                           |                                                                      | -0.14*<br>(0.06)                                              |
| Asian                  | -0.30*<br>(0.09)                                      |                                                               | -0.30<br>*(0.09)                                        |                                                                  | -0.29*<br>(0.09)                                          |                                                               | -0.30*<br>(0.09)                                           |                                                                      | -0.30*<br>(0.09)                                              |
| Black                  | -0.42*<br>(0.17)                                      |                                                               | -0.42<br>*(0.17)                                        |                                                                  | -0.39*<br>(0.18)                                          |                                                               | -0.41*<br>(0.17)                                           |                                                                      | -0.42*<br>(0.17)                                              |
| Hispanic               | -0.25*<br>(0.09)                                      |                                                               | -0.25*<br>(0.09)                                        |                                                                  | -0.23*<br>(.10)                                           |                                                               | -0.25*<br>(0.09)                                           |                                                                      | -0.25*<br>(0.09)                                              |
| Low-income             | -0.06<br>(0.07)                                       |                                                               | -0.06<br>(0.07)                                         |                                                                  | -0.06<br>(0.07)                                           |                                                               | -0.03<br>(0.08)                                            |                                                                      | -0.06<br>(0.07)                                               |
| First generation       | -0.11<br>(0.07)                                       |                                                               | -0.11<br>(0.07)                                         |                                                                  | -0.11<br>(0.07)                                           |                                                               | -0.11<br>(0.10)                                            |                                                                      | -0.23<br>(0.10)                                               |
| SAT/ACT                | 0.01***<br>(0.00)                                     |                                                               | 0.01***<br>(0.00)                                       |                                                                  | 0.01***<br>(0.00)                                         |                                                               | 0.01***<br>(0.00)                                          |                                                                      | 0.01***<br>(0.00)                                             |
|                        | F(7, 119)<br>= 9.59***                                | F(1, 119)<br>= 0.83                                           | F(8, 119)<br>= 8.45***                                  | F(1, 119) =<br>4.37*                                             | F(8, 119) =<br>8.67***                                    | F(1, 119) =<br>3.96*                                          | F(8, 119) =<br>8.67***                                     | F(1, 119) =<br>4.26*                                                 | F(8, 119) =<br>8.56***                                        |
| R <sup>2</sup>         | 0.05                                                  | 0.00                                                          | 0.05                                                    | 0.00                                                             | 0.05                                                      | 0.00                                                          | 0.05                                                       | 0.00                                                                 | 0.05                                                          |

Note. Coefficients (robust standard errors in parentheses).

\*p < .05. \*\*p < .01. \*\*\*p < .001
